# Supplementary material for: Robust Identification of Differential Gene Expression Patterns from Multiple Transcriptomics Datasets for Early Diagnosis, Prognosis, and Therapies for Breast Cancer
Source: MDPI journal article supplement (doi:10.3390/medicina59101705), 2023-09-24
Supplement: s1 [file s1]

# Robust Identification of Differential Gene Expression Patterns from Multiple Transcriptomics Datasets for Early Diagnosis, Prognosis, and Therapies for Breast Cancer

Khanis Farhana Tuly<sup>1</sup>, Md. Bayazid Hossen<sup>1</sup>, Md. Ariful Islam<sup>1</sup>, Md. Kaderi Kibria<sup>1,2</sup>, Md. Shahin Alam<sup>1</sup>, Md. Harun-Or-Roshid<sup>1</sup>, Anjuman Ara Begum<sup>1</sup>, Md. Sohel Hasan<sup>3</sup>, Rashidul Alam Mahumud<sup>4</sup> and Md. Nurul Haque Mollah<sup>1\*</sup>

## (Supplementary file)

| Supplementary Figures/ Tables legends                                                                                                                                                          | Pages |
|------------------------------------------------------------------------------------------------------------------------------------------------------------------------------------------------|-------|
| <b>Supplementary Figure:</b>                                                                                                                                                                   |       |
| <b>Figure S1.</b> Differential expression pattern analysis of HubGs with Boxplots by TCGA and GTEx data                                                                                        | 2     |
| <b>Figure S2.</b> The ROC curves for the Random Forest (RF) based breast cancer prediction model. Red and blue indicates the prediction performance of the test and independent test datasets. | 3     |
| <b>Supplementary Table:</b>                                                                                                                                                                    |       |
| <b>Table S1:</b> Breast cancer (BC) causing hub genes (HubGs) sets including datasets and analysis methods collected from 60 articles by the literature review.                                | 4-8   |
| <b>Table S2:</b> Drug lists collected from different sources                                                                                                                                   | 8-9   |
| <b>Table S3.</b> Test performance scores of the RF-based prediction model with the cutoff at FPR $\leq$ 15%                                                                                    | 10    |
| <b>Table S4.</b> Binding affinity scores for the proposed top-ranked six ligands with the <b>succinylated</b> PTM sites of hub-proteins                                                        | 10-12 |
| <b>Table S5.</b> Binding affinity scores for the proposed top-ranked six ligands with the phosphorylated PTM sites of hub-proteins                                                             | 12-14 |
| <b>Table S6.</b> Binding affinity scores for the proposed top-ranked six ligands with the <b>ubiquitinated</b> PTM sites of hub-proteins                                                       | 15-17 |

# Supplementary Figures

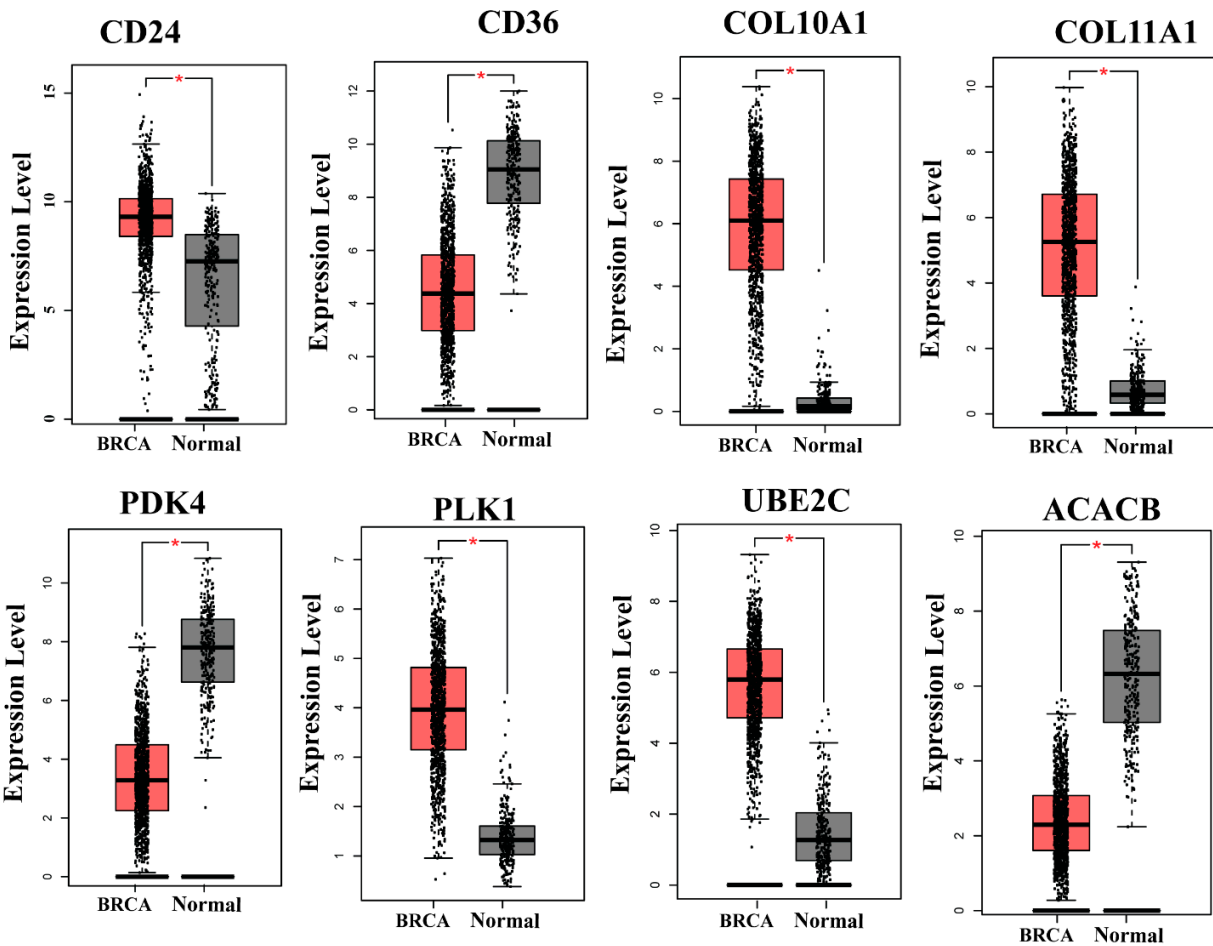

Figure S1. Differential expression pattern analysis of HubGs with Boxplots by TCGA and GTEx data

### ROC curve for RF Classifier in Breast Cancer

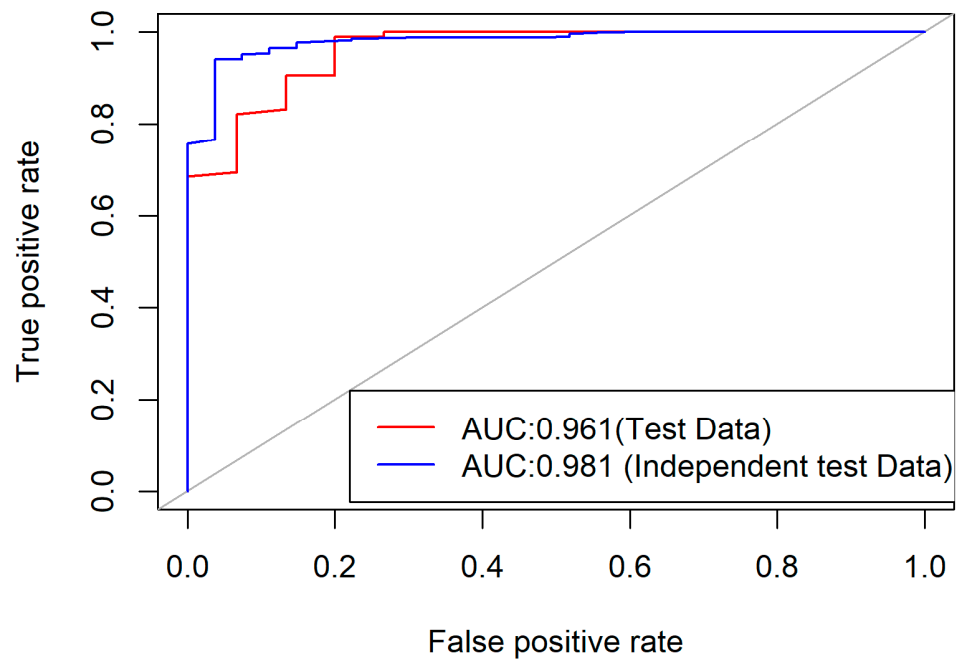

**Figure S2.** The ROC curves for the Random Forest (RF)- based breast cancer prediction model. Red and blue indicates the prediction performance of the test and independent test datasets.

## Supplementary Tables

**Table S1:** Breast cancer (BC) causing hub genes (HubGs) sets including datasets and analysis methods collected from 59 articles by the literature review.

| Articles               | Hub-DEGs (HubGs) sets                                                                                | Datasets                                                 | Methods for detection of DEGs |
|------------------------|------------------------------------------------------------------------------------------------------|----------------------------------------------------------|-------------------------------|
| Wu et al. 2020[37]     | BUB1B, CDC45, MAD2L1, PLK1, CDC20, AURKA                                                             | GSE23720, GSE45581                                       | LIMMA                         |
| Wang et al. 2020 [38]  | CCNE1, CHEK1, PLK1, CENPN, DSCC1, FAM64A, UBE2T, UBE2C                                               | TCGA dataset                                             | LIMMA                         |
| Wu et al. 2020 [39]    | FOXA1, GATA3, ESR1, PGR, CCND1, AR, TFF1, GREB1, NRIP1, KRT18                                        | GSE22093, GSE23988                                       | LIMMA                         |
| Chen et al. 2020 [40]  | RPL4, HSP90AA1, SRC, ESR1, PPP2CA, HSPA8, ACTB                                                       | GSE86945, GSE10208 and 8GSE86946                         | LIMMA                         |
| Zhou et al. 2020 [41]  | CXCL8, CD44, BMP7, MMP9                                                                              | GSE74146                                                 | LIMMA                         |
| Yang et al. 2019 [1]   | TPX2, CCNB2, BUB1, CENPE, KIF2C, NDC80, TOP2A, MELK, KIF20A, CKS2                                    | GSE25066, GSE21422                                       | LIMMA                         |
| Liu et al. 2021 [42]   | ITGB1, FERMT2, ITGA5, CEMIP, HGF, MCAM, TGFBR1, F2RL2                                                | GSE12276, GSE20685, and GSE16446                         | LIMMA                         |
| Chuan et al. 2020 [43] | CXCR4, CXCL10                                                                                        | GSE65194, GSE53752, GSE45827 and GSE38959                | LIMMA                         |
| Jin et al. 2018 [44]   | CCNB1, AURKA, BIRC5, BUB1B, ZWINT, CCNB2, CDK1, CDKN3, CENPE, PTTG1, TOP2A, CDC20, TPX2, UBE2C, PRC1 | GSE10810, GSE65194 and TCGA dataset                      | LIMMA                         |
| Tian et al. 2018 [45]  | GGTA1P, CRABP2, SYNPO2, NAP1L2, MKI67, COL4A6, MAGI2-AS3                                             | GSE60689, GSE64790                                       | LIMMA                         |
| Shi et al. 2020 [46]   | BUB1B, CCNB2, AURKA, CDK1, CDT1, KIF20A, KIF2C, HJURP, KIF4A, MELK, UBE2C, TPX2                      | GSE42568, GSE102484, GSE20685, GSE21653 and TCGA dataset | LIMMA                         |

|                         |                                                                                  |                                                                        |       |
|-------------------------|----------------------------------------------------------------------------------|------------------------------------------------------------------------|-------|
| Li et al. 2018 [47]     | PLK1, AURKA, BIRC5, BUB1, CCNB1, BUB1B, CDK1, MAD2L1, NDC80, KIF11               | GSE45827, GSE38959, and GSE65194                                       | LIMMA |
| Liu et al. 2020 [48]    | CDC20, CCNA2, CDK1, CCNB1, CCNB2, BUB1B, CDCA8, BUB1, KIF11, TOP2A               | GSE24124, GSE32641, GSE36295, GSE42568, GSE53752, GSE70947, GSE109169) | LIMMA |
| Zhang et al. 2020 [49]  | HSPD1, HSPH1, TXN, ATIC                                                          | GSE26459                                                               | LIMMA |
| Wei et al. 2021 [50]    | CDK1, TOP2A, CCNB1, MKI67, TTK, BUB1, PLK1, CCNA2                                | GSE76250                                                               | LIMMA |
| Dong et al. 2018 [51]   | AR, SOX8, RAB30, C9orf152, NRK                                                   | GSE76275                                                               | LIMMA |
| Wu et al. 2012 [52]     | MCM3, BCL2, MCM7, TGFB2                                                          | GSE11352                                                               | LIMMA |
| He et al. 2021 [53]     | TGFB3, C1QB, CEP55, SPP1, IFI6, KIAA0101, PBK, DCN, FZD7, KRT5, HIST1H2BO, SPAG5 | GSE26338                                                               | LIMMA |
| Zhu et al. 2020 [54]    | CXCL12, CXCL12, FOS                                                              | GSE59733                                                               | LIMMA |
| Li et al. 2021 [55]     | CD3G, CD3D, CD3E, GRAP2, FYN, ITK                                                | GSE43358, GSE27447, GSE39004, and GSE45827                             | LIMMA |
| Xiao et al. 2021 [56]   | NCAPG, CCNB1, MCM4, RRM2                                                         | GSE38959, GSE65212                                                     | LIMMA |
| Lu et al. 2019 [57]     | ACACB, PHLPP1, UBC, TGFB1, ACTB                                                  | GSE43837                                                               | LIMMA |
| Wang et al. 2019 [58]   | MELK, CDK1, TOP2A, CCNB1, KIF11, CCNA2                                           | GSE29431, GSE42568, GSE21422, and GSE61304                             | LIMMA |
| Yan et al. 2021 [59]    | FN1, DDR2, EFNA3, RHOQ, NRP1                                                     | GSE128610 and GSE72319                                                 | LIMMA |
| Peng et al. 2020 [60]   | TP53, SMURF1, BTRC                                                               | GSE101123                                                              | LIMMA |
| Lin et al. 2020 [61]    | TOP2A, CCNB1, RAC1, KIF20A, NUSAP1, RRM2, ASPM, BIRC5, CEP55, BUB1B              | GSE29431, GSE45827, and GSE65194                                       | LIMMA |
| Zhou and Yang 2020 [62] | IL1 $\beta$ , PTGS2, CXCL8                                                       | GSE3365 and GSE27562                                                   | LIMMA |

|                          |                                                                                                           |                                                    |       |
|--------------------------|-----------------------------------------------------------------------------------------------------------|----------------------------------------------------|-------|
| Lv et al. 2020 [63]      | IL6, PTPRC, SELL, SPN, CD40                                                                               | GSE5847, GSE22597, GSE23720, and GSE45581          | LIMMA |
| Bai et al. 2020 [64]     | STAT3, STAT1, STAT6, STAT2, XBP1, BCL2L1, ESCO2, CYB5D2                                                   | GSE21748                                           | LIMMA |
| Hao et al. 2020 [11]     | RRM2, CDC20, CCNB2, BUB1B, CDK1, CCNA2                                                                    | GSE42568, GSE61304, GSE374, GSE21422, and GSE65194 | LIMMA |
| Wang et al. 2019 [65]    | SIDT1, GPR160, ANKRD30A, CA12                                                                             | GSE76275                                           | LIMMA |
| Pei et al. 2020 [66]     | CCNB2, TPX2, EXO1, CENPA, SKA1, FOXM1, PLK1, SGO1, RAD54L, KIF4A, CDC20                                   | TCGA dataset                                       | LIMMA |
| Tang et al. 2019 [67]    | VCAM1, ANLN, BUB1, SKA3, JUN, NUSAP1, CKAP2L, TTK, FOS, STAT5A                                            | GSE100534 and GSE52604                             | LIMMA |
| Qi et al. 2019 [68]      | TOP2A, MAD2L1, PIK3R1, FEN1, EPRS, EXO1, BCL2, MCM4, PTTG1, PSMD14, CDKN3, RRM2, H2AFZ, CCNE2, FGF2, EGFR | GSE20713, GSE54002, GSE65194, and GSE32393         | LIMMA |
| Wang et al. 2018 [69]    | JUN, ATF3, STAT1, FN1, FOS, COL1A1                                                                        | GSE26910 and GSE10797                              | LIMMA |
| Fang and Zhang 2017 [70] | RPS14, RPS9, RPL11, RPL10A                                                                                | GSE10797                                           | LIMMA |
| Lou et al. 2018 [71]     | PRDM10, MAPK1                                                                                             | GSE73736                                           | LIMMA |
| Bao et al. 2019 [72]     | BCL11A, FAM171A1, FOXC1, RGMA                                                                             | TCGA dataset                                       | LIMMA |
| Zhong et al. 2020 [73]   | CT83, FABP7, ART3, TTYH1                                                                                  | GSE76275, GSE36693, GSE27447, GSE3744              | LIMMA |
| Wang et al. 2018 [74]    | TOP2A, BIRC5, NDC80, CDK1, CCNB1                                                                          | GSE5764, GSE21422, GSE22035, GSE3744, and GSE26910 | LIMMA |
| Dashti et al. 2020 [75]  | CCNA2, MAD2L1, RAD51-AS1, LINC01089                                                                       | GSE65194 and GSE45827                              | LIMMA |
| Liu et al. 2015 [76]     | FN1, FOS, IL6                                                                                             | GSE26910                                           | LIMMA |
| Bao et al. 2020 [77]     | AURKB, GINS2, UHRF1, POLE2, SPC24, E2F2, MCM10                                                            | GSE38376, GSE16179, , and GSE51889                 | LIMMA |

|                            |                                                                                                 |                                                        |               |
|----------------------------|-------------------------------------------------------------------------------------------------|--------------------------------------------------------|---------------|
| Zhang et al. 2019 [78]     | UBA5, CREB1, ARF3, SIAH1, KLHL3, TRIM69, HECTD1, MMP9, MEX3C, UBE2Q2, FBXO22, ASB6, EIF4A3, PXN | GSE31192 and GSE53031                                  | LIMMA         |
| Zheng et al. 2017 [79]     | TP53INP1, SPI1, CAPG, LEF1, PBX3, PLAGL1, EGFR, TCF7L2, SYK                                     | GSE8977                                                | LIMMA         |
| Alam et al. 2022 [14]      | AKR1C1, IRF9, SLCO2A1, NT5E, NQO1, FN1, OAS1, OAS3, ATF6B, HPGD, ANGPT1, BCL11A, TP53INP1       | GSE53566                                               | LIMMA         |
| Alam et al. 2022 [24]      | CCNA2, RFC4, CCNB1, BUB1, ASPM, TTK, CENPF                                                      | GSE45827, GSE42568, GSE139038, GSE62931, and GSE54002, | LIMMA & SAM   |
| Hong et al. 2020 [35]      | CCNB2, CDC20, PTTG1, CCNB1, BUB1B, CCNE2, TTK                                                   | GSE42568, GSE45827 and GSE54002                        | LIMMA & EdgeR |
| Zhao et al. 2019 [36]      | KRAS, CDH2, VEGFA, ZEB2, NTRK2, TWIST1                                                          | GSE101123 and TCGA dataset                             | LIMMA, EdgeR  |
| Li et al. 2020 [29]        | TTK, CCNE1, EXO1                                                                                | TCGA dataset                                           | EdgeR         |
| Lv et al. 2019 [30]        | CDC20, CCNA2, CCNB2, TTK, CENPF, BUB1, CENPA, CENPE                                             | TCGA dataset                                           | EdgeR         |
| Yuan et al. 2019 [31]      | FN1, EGFR, PTPRC, JAK3, TUBB3                                                                   | GSE139274                                              | EdgeR         |
| Cai et al. 2019 [27]       | KIF4A, TPX2, CDCA8, CCNA2, BUB1B                                                                | GSE102484                                              | WGCNA         |
| Fu et al. 2019 [28]        | KIF18B, CASC5, CKAP2L, KIF23, SKA1, CDCA5, MCM6, FAM83D, GINS1                                  | GSE102484                                              | WGCNA         |
| He et al. 2015 [32]        | MYEOV2, DUSP1, UQCRCQ                                                                           | GSE27447, GSE18864                                     | heatmap.2     |
| Takeshita et al. 2020 [25] | CTNNB1, TP53, EGFR, ERBB2, HSPB1                                                                | GSE32603 and GSE87455                                  | t-test        |
| Wang et al. 2018 [26]      | MAPK14, NOTCH1                                                                                  | GSE71142                                               | t-test        |
| Zeng et al. 2018 [33]      | FGF2, GSK3B, RAC1, ERBB2, PIK3R1, PXN, RAC2, HSP90AA1                                           | GSE22358                                               | GENE-E        |
| Qin and Chen 2016          | FSTL3, TUBA1C, DUSP8, KLF6,                                                                     | E-GEOD-50811                                           | SAM           |

|                                                   |                                                                        |                                     |                            |
|---------------------------------------------------|------------------------------------------------------------------------|-------------------------------------|----------------------------|
| [23]                                              | EIF3B, KIF20A, PTPRK, UBR2, ZSCAN20, DEPDC1, AURKA, UNG                |                                     |                            |
| Amjad et al. 2020 [34]                            | FOS, SMC4, FN1, KIF11, RACGAP1, JUN                                    | GSE129551, GSE124647, and GSE124646 | The BRBArrayTools (v4.6.0) |
| <b>Common hub genes with at least 5 articles:</b> | AURKA, BUB1, FN1, TPX2, CDC20, CCNA2, CCNB2, CCNB1, BUB1B, CDK1, TOP2A |                                     |                            |

**Table S2: Drug lists collected from different sources**

| Drug Lists                                                                                                                                                                                                                                                                                                                                                                                                                                                                                                                                                                                                                                                                                                                                                                                                                                                                                                                         | Sources                                                                                        |
|------------------------------------------------------------------------------------------------------------------------------------------------------------------------------------------------------------------------------------------------------------------------------------------------------------------------------------------------------------------------------------------------------------------------------------------------------------------------------------------------------------------------------------------------------------------------------------------------------------------------------------------------------------------------------------------------------------------------------------------------------------------------------------------------------------------------------------------------------------------------------------------------------------------------------------|------------------------------------------------------------------------------------------------|
| Gallium Notrate, Cladribine, Hydroxyurea, Motexafin Gadolinium, Gemcitabine, Clofarabine, Fludarabine Phosphate, Dinaciclib, Triapine, Fludarabine, AT-7519, Alvocidib, AZD-5438, Roniciclib, TG-02, Genistein, Cordycepin, Suramin, seliciclib, RG-547, ChEMBL1236539                                                                                                                                                                                                                                                                                                                                                                                                                                                                                                                                                                                                                                                             | Hao et al. 2020 [11]                                                                           |
| Progesterone, Levonorgestrel, Estropipate, Tamoxifen, Estradiol, Danazol, Diethylstilbestrol, Desogestrel, Mestranol, Clomifene, Polyestradiol Phosphate, Fulvestrant, Norgestimate, Medroxyprogesterone, Estrone, Dienestrol, Naloxone, Tibolone, Quinestrol, Ethynodiol Diacetate, Fluoxymesterone, Estramustine, Promestriene, Estriol, Toremifene, Lasofoxifene, Etonogestrel, Trilostane, Ospemifene, Norgestrel, Allylestrenol, Raloxifene, Megestrol, Conjugated Estrogen, Bazedoxifene, Ethinyl Estradiol, Chlorotrianisene                                                                                                                                                                                                                                                                                                                                                                                                | Dong et al. [12]                                                                               |
| 15deltaProstaglandin, Acetovanillone, APMC20mvek, Alprostadil, Anandamide, Benfotiamine, Benserazide, Bezafibrate, BISPHENOL_2286, BisphenolA, cacodylicAcid, candesartan, choline, deferoxamine, deoxythymidine_5726, dexamethasone, DICHLOROANILINE_7257, Dinoprostone, Electrocorundum, Ellipticine, Fenofibrate, Forskolin, Geldanamycin, GW9662, hydroxybenzoate_7184, IBMX, Ibuprofen, indole3aceticAcid, indomethacin, ligand, losartan, L_sorbose, Malondialdehyde, Melatonin, Metformin, Mifepristone, MK, oleicAcid, Oxazolone, Oxozinc, Oxygen, palmiticAcid, PerfluoroheptanoicAcid, PerfluorononanoicAcid, PerfluorooctanesulfonicAcid, phenylpropan_5155877, phenytoin, Pioglitazone, RetinoicAcid, Rifaximin, Rofecoxib, Rosiglitazone, salicylicAcid, Silica, Tamoxifen, Tanespinumycin, TauroursodeoxycholicAcid, Telmisartan, Tetradioxin, Thiocetic_864, Triclosan, Triflumizole, Troglitazone, Valsartan, ycl1 | Selected by the HubGs-set enrichment analysis with the drugs molecules of DSigDB database [90] |



|                                                                                                                                                                                                                                                                                                                                                                                                                                                                                                                                                                                                                                                                                                                                                                                                                                                                                                                                                                                                                                                                                                                                                                                                                                                                                                                                                                                                                                                                                                                                                                                                                                                                                                                                                                                                                                                                                                                                                                                                                                                                                                                                                                                                                                                                                                               |                                            |
|---------------------------------------------------------------------------------------------------------------------------------------------------------------------------------------------------------------------------------------------------------------------------------------------------------------------------------------------------------------------------------------------------------------------------------------------------------------------------------------------------------------------------------------------------------------------------------------------------------------------------------------------------------------------------------------------------------------------------------------------------------------------------------------------------------------------------------------------------------------------------------------------------------------------------------------------------------------------------------------------------------------------------------------------------------------------------------------------------------------------------------------------------------------------------------------------------------------------------------------------------------------------------------------------------------------------------------------------------------------------------------------------------------------------------------------------------------------------------------------------------------------------------------------------------------------------------------------------------------------------------------------------------------------------------------------------------------------------------------------------------------------------------------------------------------------------------------------------------------------------------------------------------------------------------------------------------------------------------------------------------------------------------------------------------------------------------------------------------------------------------------------------------------------------------------------------------------------------------------------------------------------------------------------------------------------|--------------------------------------------|
| 5-FU, Abraxane, AdoTrastuzumabEmtansine, AfinitorDisperzEverolimus, AfinitorEverolimus, Aredia_PamidronateDisodium, ArimidexAnastrozole, LynparzaOlaparib, MegestrolAcetate, AromasinExemestane, EllenceEpirubicinHydrochloride, EribulinMesylate, FarestonToremifene, FaslodexFulvestrant, FemaraLetrozole, Talzenna, Fulvestrant, Gemzar_GemcitabineHydrochloride, GoserelinAcetate, HalavenEribulinMesylate, IbrancePalbociclib, IxempriaXabepilone, Kadcylla, KisqaliRibociclib, MethotrexateSodium, NeratinibMaleate, NerlynxNeratinibMaleate, Tykerb, PamidronateDisodium, PiqrayAlpelisib, SoltamoxTamoxifen, Talazoparib_Tosylate, Zoladex, TamoxifenCitrate, TaxotereDocetaxel, Tepadina-Thiotepa, Trexall, TukysaTucatinib, VerzenioAbemaciclib, VinblastineSulfate, Xeloda,                                                                                                                                                                                                                                                                                                                                                                                                                                                                                                                                                                                                                                                                                                                                                                                                                                                                                                                                                                                                                                                                                                                                                                                                                                                                                                                                                                                                                                                                                                                        | FDA approved Drugs for Breast cancer [179] |
| <b>Combined list of 142 drugs by taking union of all drug lists mentioned above, is given below</b>                                                                                                                                                                                                                                                                                                                                                                                                                                                                                                                                                                                                                                                                                                                                                                                                                                                                                                                                                                                                                                                                                                                                                                                                                                                                                                                                                                                                                                                                                                                                                                                                                                                                                                                                                                                                                                                                                                                                                                                                                                                                                                                                                                                                           |                                            |
| 15deltaProstaglandin, 5_FU, Abraxane, Acetovanillone, AcmC20mvek, AdoTrastuzumabEmtansine, AfinitorDisperzEverolimus, AfinitorEverolimus, Allylestrenol, Alprostadil, ALVOCIDIB, Anandamide, Aredia_PamidronateDisodium, ArimidexAnastrozole, AromasinExemestane, AT_7519, AZD_5438, Bazedoxifene, Benfotiamine, Bezafibrate, BISPHEINOL_2286, BisphenolA, Candesartan, ChEMBL1236539, Chlorotrianisene, Choline, CLADTRIBINE, CLOFARABINE, Clomifene, conjugated estrogen, CORDYCEPIN, Danazol, Deferoxamine, deoxythymidine_5726, desogestrel, dexamethasone, diacetate, DICHLOROANILINE_7257, Dienestrol, Diethylstilbestrol, DINACICLIB, Dinoprostone, EllenceEpirubicinHydrochloride, Ellipticine, EribulinMesylate, Estradiol, Estramustine, Estriol, Estrone, Estropipate, ethinyl estradiol, ethynodiol, etonogestrel, FarestonToremifene, FaslodexFulvestrant, FemaraLetrozole, Fenofibrate, FLUDARABINE, FLUDARABINE PHOSPHATE, Fluoxymesterone, Forskolin, Fulvestrant, Geldanamycin, GEMCITABINE, Gemzar_GemcitabineHydrochloride, GENISTEIN, GoserelinAcetate, GW9662, HalavenEribulinMesylate, hydroxybenzoate_7184, HYDROXYUREA, IBMX, IbrancePalbociclib, Ibuprofen, indole3aceticAcid, indomethacin, IxempriaXabepilone, Kadcylla, KisqaliRibociclib, Lasofoxifene, Levonorgestrel, Ligand, Losartan, L_sorbose, LynparzaOlaparib, Malondialdehyde, Medroxyprogesterone, MegestrolAcetate, Megestrol, Melatonin, Mestranol, Metformin, MethotrexateSodium, Mifepristone, MK, Naloxone, NeratinibMaleate, NerlynxNeratinibMaleate, Norgestimate, oleicAcid, ospemifene, Oxazolone, Oxygen, palmiticAcid, PamidronateDisodium, PerfluoroheptanoicAcid, phenylpropan_5155877, phenytoin, Pioglitazone, PiqrayAlpelisib, polyestradiol phosphate, progesterone, promestriene, quinestrol, raloxifene, RetinoicAcid, RG_547, Rifaximin, Rofecoxib, Roniciclib, salicylicAcid, SELICICLIB, Silica, SURAMIN, Talazoparib_Tosylate, Talzenna, TamoxifenCitrate, Tamoxifen, Tanespimycin, TauroursodeoxycholicAcid, TaxotereDocetaxel, Telmisartan, Tepadina_Thiotepa, Tetradoxin, TG_02, Thioctic_864, Tibolone, Toremifene, Trexall, TRIAPINE, Triclosan, Triflumizole, Trilostane, Troglitazone, TukysaTucatinib, Tykerb, Valsartan, VerzenioAbemaciclib, VinblastineSulfate, Xeloda, yc1, Zoladex |                                            |

**Table S3.** Test performance scores of the RF-based prediction model with the cutoff at FPR  $\leq$  15%

|                                         | Test Dataset | Independent Test Dataset |
|-----------------------------------------|--------------|--------------------------|
| Area under the ROC Curve (AUC)          | 0.961        | 0.981                    |
| Accuracy (ACC)                          | 0.881        | 0.906                    |
| Sensitivity or true positive rate (TPR) | 0.867        | 0.962                    |
| Specificity or true negative rate (TNR) | 0.852        | 0.850                    |
| False negative rate (FNR)               | 0.222        | 0.037                    |
| False positive rate (FPR)               | 0.147        | 0.149                    |
| False discovery rate (FDR)              | 0.020        | 0.134                    |

**Table S4.** Binding affinity scores for the proposed top-ranked six ligands with the **succinylated** PTM sites of hub-proteins

| Top six ligands   | Succinylated sites of ACACB protein |       |       |      |       |      |                   |                   |       |       |       |  |
|-------------------|-------------------------------------|-------|-------|------|-------|------|-------------------|-------------------|-------|-------|-------|--|
|                   | K83                                 | K158  | K228  | K305 | K435  | K722 | K126 <sub>4</sub> | K144 <sub>9</sub> | K1469 | K1473 | K2246 |  |
| Suramin           | -9                                  | -13.1 | -8.2  | -8.1 | -12.1 | -8.3 | -8.2              | -8.4              | -7.8  | -8.7  | -6.7  |  |
| Rifaximin         | -9.2                                | -8.5  | -12.1 | -9   | -8.7  | -7.1 | -7.3              | -6.9              | -6.8  | -8.8  | -8.2  |  |
| Telmisartan       | -9                                  | -7.1  | -8.2  | -6.9 | -7.1  | -7.3 | -9.5              | -8.8              | -8.3  | -7.2  | -8.1  |  |
| Tukysa-Tucatinib  | -8.9                                | -7.2  | -8.3  | -8.8 | -7.7  | -9.5 | -7.2              | -8.9              | -9    | -6.6  | -7.6  |  |
| Lynparza-Olaparib | -12.1                               | -13.1 | -8.2  | -8.9 | -8.5  | -7.2 | -8.4              | -7.3              | -9.2  | -8.5  | -8.4  |  |
| TG.02             | -8.1                                | -8.8  | -8    | -8.4 | -7.1  | -8.4 | -8.9              | -6.9              | -12.1 | -5.6  | -7.9  |  |

| Top six ligands   | Succinylated sites of CD36 protein    |       |      |      |      |      |      |       |       |       |  |  |
|-------------------|---------------------------------------|-------|------|------|------|------|------|-------|-------|-------|--|--|
|                   | K213                                  | K218  | K223 | K231 | K286 | K403 | K406 |       |       |       |  |  |
| Suramin           | -7.5                                  | -8.2  | -7.5 | -8.1 | -9.5 | -9   | -7.1 |       |       |       |  |  |
| Rifaximin         | -8.2                                  | -10.2 | -8.4 | -8.3 | -7.2 | -6.9 | -7.7 |       |       |       |  |  |
| Telmisartan       | -7.5                                  | -7.3  | -8.2 | -9   | -9.5 | -9.1 | -8.5 |       |       |       |  |  |
| Tukysa-Tucatinib  | -8.2                                  | -9    | -8.9 | -7.6 | -7.6 | -7.5 | -7.1 |       |       |       |  |  |
| Lynparza-Olaparib | -7                                    | -8.8  | -8.4 | -9   | -5.3 | -7.1 | -7.1 |       |       |       |  |  |
| TG.02             | -8.9                                  | -9    | -6.6 | -6.9 | -7.1 | -8.8 | -8.4 |       |       |       |  |  |
| Top six ligands   | Succinylated sites of COL10A1 protein |       |      |      |      |      |      |       |       |       |  |  |
|                   | K116                                  | K126  | K400 |      |      |      |      |       |       |       |  |  |
| Suramin           | -8.1                                  | -9.1  | -6.8 |      |      |      |      |       |       |       |  |  |
| Rifaximin         | -8.3                                  | -8.8  | -7.7 |      |      |      |      |       |       |       |  |  |
| Telmisartan       | -9                                    | -6.6  | -7.6 |      |      |      |      |       |       |       |  |  |
| Tukysa-Tucatinib  | -8.8                                  | -8.2  | -7.5 |      |      |      |      |       |       |       |  |  |
| Lynparza-Olaparib | -7.8                                  | -8.7  | -6.7 |      |      |      |      |       |       |       |  |  |
| TG.02             | -9.2                                  | -8.5  | -8.4 |      |      |      |      |       |       |       |  |  |
| Top six ligands   | Succinylated sites of COL11A1 protein |       |      |      |      |      |      |       |       |       |  |  |
|                   | K163                                  | K173  | K183 | K387 | K789 | K795 | K875 | K1019 | K1182 | K1443 |  |  |
| Suramin           | -7.2                                  | -8.4  | -7.3 | -9.2 | -8.2 | -7.5 | -8.9 | -6.8  | -6.9  | -8.5  |  |  |
| Rifaximin         | -8.1                                  |       | -8.7 | -7.1 | -7.3 | -8.7 | -8.4 | -8.5  | -9.1  | -7.1  |  |  |
| Telmisartan       | -9                                    | -7.2  | -8.3 | -7.6 | -7.5 | -8.5 | -7.5 | -7.5  | -7.5  | -7.2  |  |  |
| Tukysa-Tucatinib  | -6.9                                  | -8.5  | -8.8 | -8   | -6.8 | -7.3 | -8.2 | -8.4  | -7.1  | -13.1 |  |  |
| Lynparza-Olaparib | -8.1                                  | -12.1 | -9   | -7.1 | -8.2 | -9.5 | -8.9 | -6.8  | -8.8  | -8.8  |  |  |

|                        |                                           |      |      |      |      |      |      |      |      |      |  |  |
|------------------------|-------------------------------------------|------|------|------|------|------|------|------|------|------|--|--|
| TG.02                  | -7.3                                      | -8.2 | -9.2 | -9.1 | -7.1 | -7.6 | -8.2 | -8.5 | -8.1 | -8.5 |  |  |
| <b>Top six ligands</b> | <b>Succinylated sites of PDK4 protein</b> |      |      |      |      |      |      |      |      |      |  |  |
|                        | K142                                      |      |      |      |      |      |      |      |      |      |  |  |
| Suramin                | -9.5                                      |      |      |      |      |      |      |      |      |      |  |  |
| Rifaximin              | -7.6                                      |      |      |      |      |      |      |      |      |      |  |  |
| Telmisartan            | -5.3                                      |      |      |      |      |      |      |      |      |      |  |  |
| Tukysa-Tucatinib       | -7.7                                      |      |      |      |      |      |      |      |      |      |  |  |
| Lynparza-Olaparib      | -8.5                                      |      |      |      |      |      |      |      |      |      |  |  |
| TG.02                  | -7.1                                      |      |      |      |      |      |      |      |      |      |  |  |
|                        |                                           |      |      |      |      |      |      |      |      |      |  |  |

**Table S5.** Binding affinity scores for the proposed top-ranked six ligands with the phosphorylated PTM sites of hub-proteins

|                        |                                              |      |      |      |       |       |      |      |       |       |  |  |
|------------------------|----------------------------------------------|------|------|------|-------|-------|------|------|-------|-------|--|--|
| <b>Top six ligands</b> | <b>Phosphorylated sites of ACACB protein</b> |      |      |      |       |       |      |      |       |       |  |  |
|                        | S302                                         | S350 | T70  | S72  | S175  | S195  | S246 | S469 | S1360 | T2025 |  |  |
| Suramin                | -10                                          | -7.2 | -7.1 | -8.5 | -12.1 | -6.2  | -5.6 | -9.1 | -8.2  | -7.5  |  |  |
| Rifaximin              | -8.3                                         | -5.3 | -8.1 | -9.1 | -8.7  | -12.1 | -8   | -8.2 | -7.6  | -9.1  |  |  |
| Telmisartan            | -8                                           | -10  | -7   | -7.1 | -8.8  | -7.9  | -7.8 | -7.3 | -9    | -11.1 |  |  |
| Tukysa-Tucatinib       | -9                                           | -9.2 | -5.3 | -8.4 | -7.7  | -9.2  | -7   | -9.5 | -6.8  | -8.1  |  |  |
| Lynparza-Olaparib      | -10.2                                        | -9.1 | -6.8 | -9.5 | -8    | -8.5  | -7.9 | -7.2 | -8.4  | -8.7  |  |  |
| TG.02                  | -8.1                                         | -7.6 | -8.8 | -7.7 | -8.3  | -8.9  | -7.2 | -8.4 | -6.6  | -7.4  |  |  |
| <b>Top six</b>         | <b>Phosphorylated sites of CD36 protein</b>  |      |      |      |       |       |      |      |       |       |  |  |

| <b>ligands</b>         | S302                                           | S350  |       |      |       |       |       |       |       |       |       |  |
|------------------------|------------------------------------------------|-------|-------|------|-------|-------|-------|-------|-------|-------|-------|--|
| Suramin                | -7.3                                           | -9.5  |       |      |       |       |       |       |       |       |       |  |
| Rifaximin              | -11.2                                          | -8.7  |       |      |       |       |       |       |       |       |       |  |
| Telmisartan            | -9                                             | -7.9  |       |      |       |       |       |       |       |       |       |  |
| Tukysa-Tucatinib       | -8.2                                           | -9.5  |       |      |       |       |       |       |       |       |       |  |
| Lynparza-Olaparib      | -6.8                                           | -8.1  |       |      |       |       |       |       |       |       |       |  |
| TG.02                  | -5.5                                           | -6.8  |       |      |       |       |       |       |       |       |       |  |
| <b>Top six ligands</b> | <b>Phosphorylated sites of COL10A1 protein</b> |       |       |      |       |       |       |       |       |       |       |  |
|                        | T61                                            | S87   | S381  | S384 | S471  | S533  | T547  |       |       |       |       |  |
| Suramin                | -6.2                                           | -11.2 | -9.5  | -6.8 | -8.1  | -8    | -8.8  |       |       |       |       |  |
| Rifaximin              | -9.3                                           | -8.2  | -7.2  | -7.9 | -12.1 | -7.6  | -7.2  |       |       |       |       |  |
| Telmisartan            | -7.9                                           | -7.5  | -8.7  | -8.3 | -9.5  | -7.4  | -6.6  |       |       |       |       |  |
| Tukysa-Tucatinib       | -7.1                                           | -8.5  | -12.1 | -8.3 | -7.9  | -8.2  | -8.5  |       |       |       |       |  |
| Lynparza-Olaparib      | -6.8                                           | -9.5  | -8.7  | -7.1 | -9.2  | -12.1 | -5.6  |       |       |       |       |  |
| TG.02                  | -8.4                                           | -8.3  | -8.8  | -7.4 | -8.3  | -9    | -8.5  |       |       |       |       |  |
| <b>Top six ligands</b> | <b>Phosphorylated sites of COL11A1 protein</b> |       |       |      |       |       |       |       |       |       |       |  |
|                        | S50                                            | S134  | S240  | T358 | S370  | T659  | S1058 | T1067 | S1481 | T1558 | S1737 |  |
| Suramin                | -5.6                                           | -7.1  | -8.2  | -7.5 | -7.7  | -8.4  | -8.7  | -7.9  | -6.7  | -7.1  | -8.2  |  |
| Rifaximin              | -8                                             | -8.4  | -7.7  | -9.2 | -7    | -9.5  | -6.8  | -8.1  | -8.4  | -7.7  | -9.2  |  |
| Telmisartan            | -8.1                                           | -7.5  | -8.5  | -8.8 | -8    | -6.8  | -8.9  | -7.6  | -7.5  | -8.5  | -8.8  |  |
| Tukysa-Tucatinib       | -7                                             | -8.8  | -8.8  | -7.7 | -8.3  | -8.9  | -7.2  | -8.4  | -6.6  | -7.4  | -7.7  |  |
| Lynparza-Olaparib      | -7.9                                           | -7.1  | -8.9  | -7.1 | -8.5  | -12.1 | -8.3  | -7.9  | -8.2  | -8.5  | -7.1  |  |
| TG.02                  | -7.2                                           | -10   | -7.2  | -7.1 | -8.5  | -12.1 | -6.2  | -5.6  | -9.1  | -8.2  | -7.5  |  |
| <b>Top six</b>         | <b>Phosphorylated sites of PDK4 protein</b>    |       |       |      |       |       |       |       |       |       |       |  |

| ligands           | S10                                    | S13  | S33  | S106  | S222 | T316 | S390 |      |  |  |  |  |
|-------------------|----------------------------------------|------|------|-------|------|------|------|------|--|--|--|--|
| Suramin           | -8.1                                   | -7.6 | -8.8 | -7.7  | -8.3 | -8.9 | -7.2 |      |  |  |  |  |
| Rifaximin         | -8.8                                   | -8.2 | -7.5 | -8.1  | -8.1 | -9.1 | -6.8 |      |  |  |  |  |
| Telmisartan       | -7.2                                   | -8.7 | -7.9 | -12.1 | -7   | -7.1 | -8.4 |      |  |  |  |  |
| Tukysa-Tucatinib  | -6.6                                   | -8.8 | -8   | -8.4  | -5.3 | -8.4 | -6.6 |      |  |  |  |  |
| Lynparza-Olaparib | -7.8                                   | -8.7 | -6.7 | -8    | -7   | -8.1 | -5.3 |      |  |  |  |  |
| TG.02             | -7                                     | -8.8 | -8.4 | -9    | -5.3 | -7.1 | -6.8 |      |  |  |  |  |
| Top-three ligands | Phosphorylation sites of CD24 protein  |      |      |       |      |      |      |      |  |  |  |  |
|                   | T34                                    | T34  | T34  |       |      |      |      |      |  |  |  |  |
| Suramin           | -7.1                                   | -7.1 | -7.1 |       |      |      |      |      |  |  |  |  |
| Rifaximin         | -5.2                                   | -5.2 | -5.2 |       |      |      |      |      |  |  |  |  |
| Telmisartan       | -4.3                                   | -4.3 | -4.3 |       |      |      |      |      |  |  |  |  |
| Top-three ligands | Phosphorylation sites of PLK1 protein  |      |      |       |      |      |      |      |  |  |  |  |
|                   | S2                                     | T6   | S71  | S103  | S137 | T210 | T214 | S269 |  |  |  |  |
| Suramin           | -5.3                                   | -4.6 | -7.1 | -6.2  | -3.4 | -4.5 | -6.7 | -5.6 |  |  |  |  |
| Rifaximin         | -4.2                                   | -3.5 | -5.4 | -4.2  | -6.1 | -5.2 | -6.1 | -5.2 |  |  |  |  |
| Telmisartan       | -5.3                                   | -4.3 | -6.1 | -5.2  | -4.2 | -4.3 | -5.8 | -4.8 |  |  |  |  |
| Top-three ligands | Phosphorylation sites of UBE2C protein |      |      |       |      |      |      |      |  |  |  |  |
|                   | S3                                     | S12  | S176 |       |      |      |      |      |  |  |  |  |
| Suramin           | -4.5                                   | -5.3 | -3.2 |       |      |      |      |      |  |  |  |  |
| Rifaximin         | -5.3                                   | -4.8 | -4.3 |       |      |      |      |      |  |  |  |  |
| Telmisartan       | -5.1                                   | -4.6 | -4.1 |       |      |      |      |      |  |  |  |  |

**Table S6.** Binding affinity scores for the proposed top-ranked six ligands with the **ubiquitinated** PTM sites of hub-proteins

| Top six ligands | Ubiquitinated sites of ACACB protein |      |     |     |      |      |      |      |       |       |  |  |
|-----------------|--------------------------------------|------|-----|-----|------|------|------|------|-------|-------|--|--|
|                 | S302                                 | S350 | T70 | S72 | S175 | S195 | S246 | S469 | S1360 | T2025 |  |  |

|                   |                                         |      |      |      |      |       |       |       |       |       |       |  |
|-------------------|-----------------------------------------|------|------|------|------|-------|-------|-------|-------|-------|-------|--|
| Suramin           | -9.2                                    | -7.8 | -8.1 | -8   | -9.2 | -7.4  | -8.1  | -8.1  | -9    | -7    |       |  |
| Rifaximin         | -7.1                                    | -8.5 | -8.9 | -7.1 | -8.5 | -6.7  | -8.8  | -7.9  | -8.7  | -8.4  |       |  |
| Telmisartan       | -8.3                                    | -8.9 | -8.1 | -7.5 | -8.5 | -8.1  | -5.6  | -10   | -7.2  | -6.9  |       |  |
| Tukysa-Tucatinib  | -7.3                                    | -7.6 | -7.1 | -7.9 | -8.4 | -7.3  | -9.1  | -8.3  | -10.2 | -8.2  |       |  |
| Lynparza-Olaparib | -7                                      | -8.8 | -8.4 | -9   | -7.2 | -6.9  | -11.1 | -8    | -8    | -12.1 |       |  |
| TG.02             | -7                                      | -8.1 | -5.3 | -6.9 | -8.2 | -7.5  | -8.1  | -8.1  | -9    | -9.1  |       |  |
| Top six ligands   | Ubiquitinated sites of CD36 protein     |      |      |      |      |       |       |       |       |       |       |  |
|                   | S302                                    | S350 |      |      |      |       |       |       |       |       |       |  |
| Suramin           | -8.8                                    | -8.2 |      |      |      |       |       |       |       |       |       |  |
| Rifaximin         | -8.5                                    | -7.3 |      |      |      |       |       |       |       |       |       |  |
| Telmisartan       | -7.1                                    | -9.5 |      |      |      |       |       |       |       |       |       |  |
| Tukysa-Tucatinib  | -7.2                                    | -8.2 |      |      |      |       |       |       |       |       |       |  |
| Lynparza-Olaparib | -8.5                                    | -5.6 |      |      |      |       |       |       |       |       |       |  |
| TG.02             | -12.1                                   | -6.2 |      |      |      |       |       |       |       |       |       |  |
| Top six ligands   | Ubiquitination sites of COL10A1 protein |      |      |      |      |       |       |       |       |       |       |  |
|                   | T61                                     | S87  | S381 | S384 | S471 | S533  | T547  |       |       |       |       |  |
| Suramin           | -7.7                                    | -7.1 | -8.4 | -6.8 | -8   | -7    | -8.1  |       |       |       |       |  |
| Rifaximin         | -8.1                                    | -9.2 | -7.3 | -8.4 | -7.7 | -8.3  | -8.5  |       |       |       |       |  |
| Telmisartan       | -12.1                                   | -8.4 | -9   | -5.3 | -8.1 | -8.1  | -7.4  |       |       |       |       |  |
| Tukysa-Tucatinib  | -8.4                                    | -9   | -7.5 | -6.8 | -8.9 | -5.6  | -9.1  |       |       |       |       |  |
| Lynparza-Olaparib | -8.1                                    | -8   | -8.3 | -7.6 | -8   | -12.1 | -8    |       |       |       |       |  |
| TG.02             | -12.1                                   | -7.6 | -9.5 | -8   | -7.6 | -7.9  | -7.8  |       |       |       |       |  |
| Top six ligands   | Ubiquitination sites of COL11A1 protein |      |      |      |      |       |       |       |       |       |       |  |
|                   | S50                                     | S134 | S240 | T358 | S370 | T659  | S1058 | T1067 | S1481 | T1558 | S1737 |  |

|                   |                                       |      |       |      |       |       |       |      |       |      |       |  |
|-------------------|---------------------------------------|------|-------|------|-------|-------|-------|------|-------|------|-------|--|
| Suramin           | -8.3                                  | -8.9 | -7.2  | -7.6 | -9.1  | -12.1 | -11.1 | -8.2 | -12.1 | -6.2 | -5.6  |  |
| Rifaximin         | -8.1                                  | -8.4 | -7.7  | -8.4 | -7.1  | -8.9  | -8.9  | -8.7 | -9    | -7.5 | -10.2 |  |
| Telmisartan       | -8.4                                  | -8.3 | -8.1  | -8.4 | -7.5  | -9.2  | -7.1  | -7.9 | -7.6  | -8   | -7.9  |  |
| Tukysa-Tucatinib  | -7.2                                  | -6.6 | -7.6  | -9.5 | -9.1  | -8.2  | -7.5  | -9.5 | -9    | -7.8 | -6.2  |  |
| Lynparza-Olaparib | -8.7                                  | -8.2 | -8.4  | -6.8 | -11.1 | -6.9  | -6.2  | -8.1 | -6.8  | -7   | -8.1  |  |
| TG.02             | -12.1                                 | -9.1 | -7.9  | -8.4 | -8.1  | -13.1 | -7.5  | -7.9 | -8.4  | -7.9 | -8.4  |  |
| Top six ligands   | Ubiquitination sites of PDK4 protein  |      |       |      |       |       |       |      |       |      |       |  |
|                   | S10                                   | S13  | S33   | S106 | S222  | T316  | S390  |      |       |      |       |  |
| Suramin           | -7.8                                  | -7.3 | -10.2 | -9.1 | -6.8  | -8.1  | -9.1  |      |       |      |       |  |
| Rifaximin         | -7                                    | -9.5 | -8    | -5.6 | -8.8  | -9.1  | -8.7  |      |       |      |       |  |
| Telmisartan       | -7.3                                  | -7.9 | -7.8  | -7.7 | -8.9  | -7.1  | -8.8  |      |       |      |       |  |
| Tukysa-Tucatinib  | -9.5                                  | -9.2 | -7    | -7.5 | -7.3  | -8.4  | -7.7  |      |       |      |       |  |
| Lynparza-Olaparib | -11.1                                 | -6.2 | -7.2  | -8.4 | -6.6  | -9.5  | -8    |      |       |      |       |  |
| TG.02             | -8.1                                  | -8.2 | -8.3  | -8.5 | -12.1 | -8.3  | -7.9  |      |       |      |       |  |
| Top-three ligands | Ubiquitination sites of CD24 protein  |      |       |      |       |       |       |      |       |      |       |  |
|                   | K56                                   | K81  |       |      |       |       |       |      |       |      |       |  |
| Suramin           | -6.4                                  | -6.1 |       |      |       |       |       |      |       |      |       |  |
| Rifaximin         | -5.1                                  | -4.9 |       |      |       |       |       |      |       |      |       |  |
| Telmisartan       | -5.7                                  | -5.3 |       |      |       |       |       |      |       |      |       |  |
| Top-three ligands | Ubiquitination sites of PLK1 protein  |      |       |      |       |       |       |      |       |      |       |  |
|                   | K9                                    | K19  | K38   | K178 |       |       |       |      |       |      |       |  |
| Suramin           | -7.0                                  | -6.8 | -4.5  | -5.2 |       |       |       |      |       |      |       |  |
| Rifaximin         | -6.2                                  | -6.4 | -5.1  | -4.6 |       |       |       |      |       |      |       |  |
| Telmisartan       | -6.4                                  | -5.3 | -4.7  | -3.9 |       |       |       |      |       |      |       |  |
| Top-three ligands | Ubiquitination sites of UBE2C protein |      |       |      |       |       |       |      |       |      |       |  |



|             |      |      |      |      |  |  |  |  |  |  |  |  |
|-------------|------|------|------|------|--|--|--|--|--|--|--|--|
|             | K18  | K61  | K119 | K172 |  |  |  |  |  |  |  |  |
| Suramin     | -5.3 | -4.3 | -6.3 | -5.8 |  |  |  |  |  |  |  |  |
| Rifaximin   | -5.2 | -5.3 | -5.5 | -6.1 |  |  |  |  |  |  |  |  |
| Telmisartan | -4.2 | -4.6 | -5.1 | -5.3 |  |  |  |  |  |  |  |  |
